# Supplementary material for: Beta-cell regeneration from vimentin+/MafB+ cells after STZ-induced extreme beta-cell ablation
Source: PubMed Central journal article supplement (PMC4486952; doi:10.1038/srep11703), 2015-07-01
Supplement: srep11703-s1.pdf [file srep11703-s1.pdf]

## **Beta-cell regeneration from vimentin<sup>+</sup>/MafB<sup>+</sup> cells after STZ-induced extreme beta-cell ablation**

Yu Cheng<sup>a,b,c</sup>, Hongjun Kang<sup>d,e</sup>, Jing Shen<sup>a,b,c,e</sup>, Haojie Hao<sup>b</sup>, Jiejie Liu<sup>b</sup>, Yelei Guo<sup>b</sup>, Yiming Mu<sup>a\*</sup> and Weidong Han<sup>b\*</sup>

<sup>a</sup>Department of Endocrinology, Chinese PLA General Hospital, 28 Fuxing Road, Beijing 100853, China; <sup>b</sup>Department of Molecular Biology, Institute of Basic Medicine, School of Life Science, Chinese PLA General Hospital, 28 Fuxing Road, Beijing 100853, China; <sup>c</sup>Department of Endocrinology, Chinese PLA 309 Hospital, 17 Heishanhu Road, Beijing 100091, China; <sup>d</sup>Department of Critical Care Medicine, Chinese PLA General Hospital, 28 Fuxing Road, Beijing 100853, China.

<sup>e</sup>These authors contributed equally to this work

\*Correspondence should be addressed to:

MD., Ph.D. Yiming Mu  
Department of Endocrinology,  
Chinese PLA General Hospital,  
Beijing 100853, China  
E-mail: [muyiming@301hospital.com.cn](mailto:muyiming@301hospital.com.cn)  
Tel.: +86(10)55499001  
Fax: +86(10)68168631

MD., Ph.D. Weidong Han  
Department of Molecular Biology,  
Institute of Basic Medicine,  
School of Life Sciences,  
Chinese PLA General Hospital,  
Beijing 100853, China  
E-mail: [hanwdrsw69@yahoo.com](mailto:hanwdrsw69@yahoo.com)  
Tel.: +86(10)66937463  
Fax: +86(10)66937516

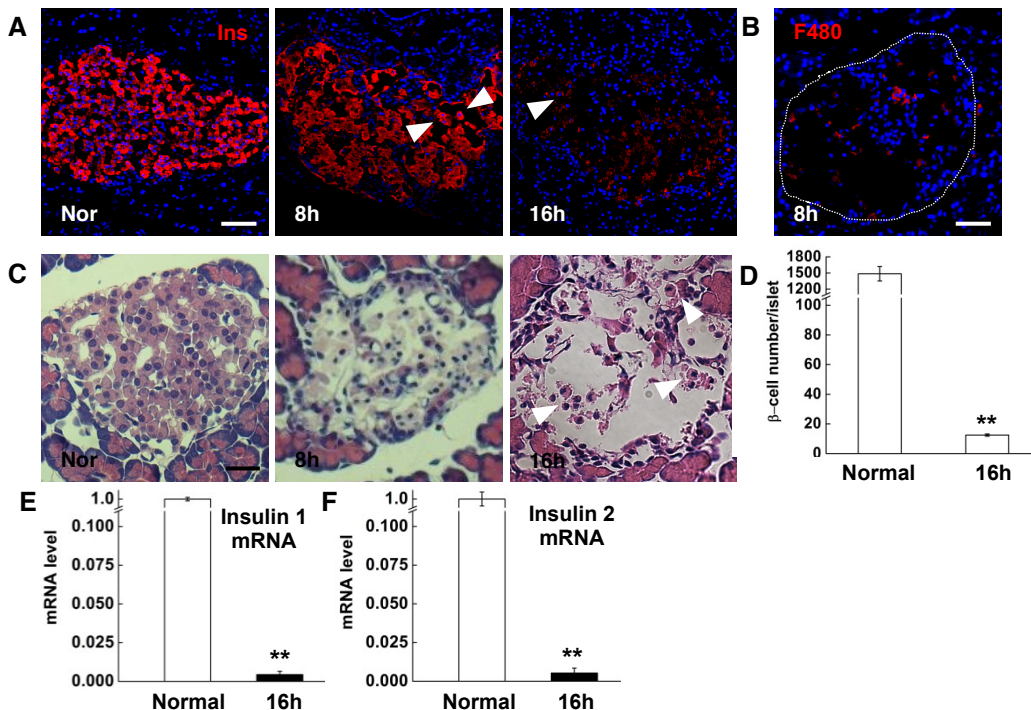

**Figure S1. A single high dose STZ induced acute and extreme beta-cell injury.**

(A) Representative islets stained with insulin (red) of normal control SD rats (Nor), and STZ-treated rats at indicated time points (8h, 16h). Nuclei were labeled with DAPI. Scale bars, 50 $\mu$ m. The isosceles triangle: remaining insulin stained cells. (B) Representative islets stained with F430 (red) of STZ-treated rats (8h). Scale bars, 50 $\mu$ m. (C) Representative islets from rat pancreas sections (4 $\mu$ m). The sections were performed with hematoxylin and eosin staining. The isosceles triangle: a group of round-shaped cells. Scale bars, 20 $\mu$ m. (D) Quantification of b-cell number. (E, F) Ins1 and Ins2 gene expression in isolated islets of normal control and STZ-treated rats (16h). Data are shown as means  $\pm$  SEM, n=5-6 rats per group. \*P < 0.05 and \*\*P < 0.01.

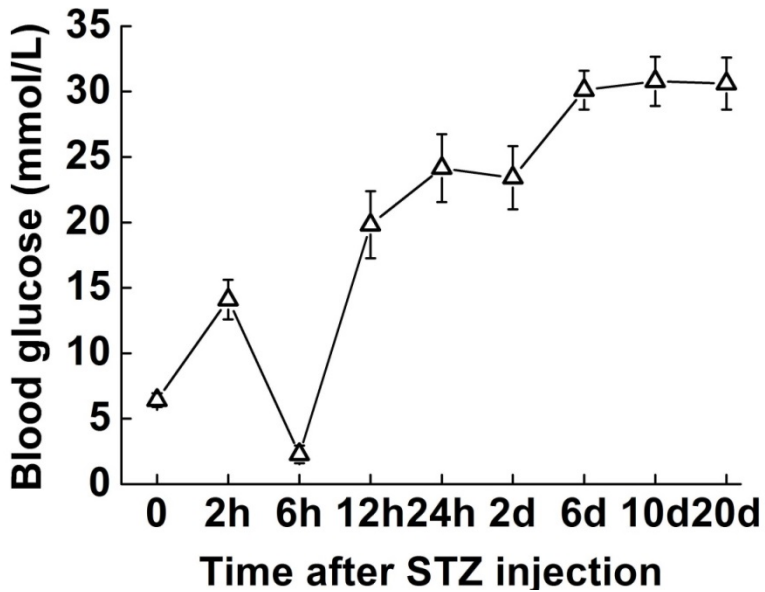

**Figure S2.** Random blood glucose levels post STZ injection. Data are shown as means  $\pm$  SEM, n=10 rats.

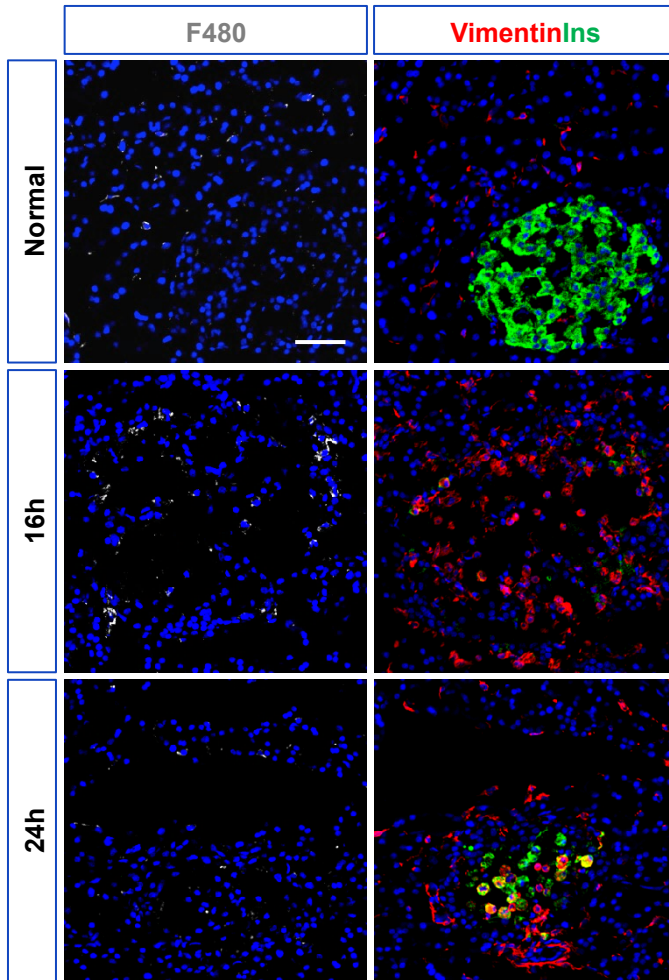

**Figure S3.** The round-shaped vimentin<sup>+</sup> cells did not express macrophage marker F480. The photomicrographs in the left column showed representative islets stained with anti-F480 (gray), and the right column with anti-vimentin (red) and anti-insulin (green) antibodies of the consecutive slides from normal control SD rats (Nor), and STZ-treated rats at different time points (16 h, 24 h). Nuclei were labeled with DAPI. Scale bars, 50 $\mu$ m.

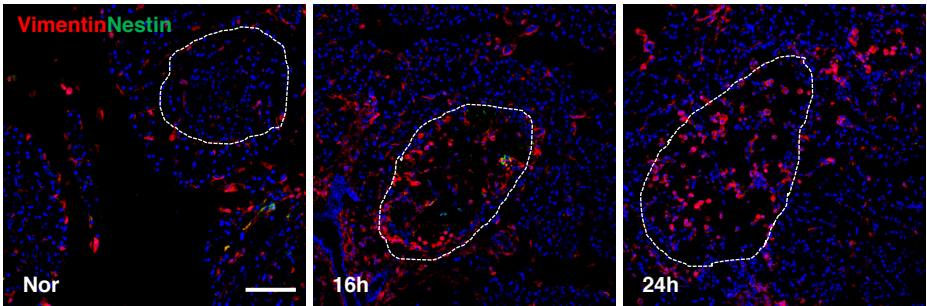

**Figure S4.** Very limited recruitment of nestin-positive cells to damaged islets. The photomicrographs stained with anti-vimentin (red) and anti-nestin (green) antibodies from normal control SD rats (Nor), and STZ-treated rats at different time points (16 h, 24 h). Nuclei were labeled with DAPI. Scale bars, 100 $\mu$ m.

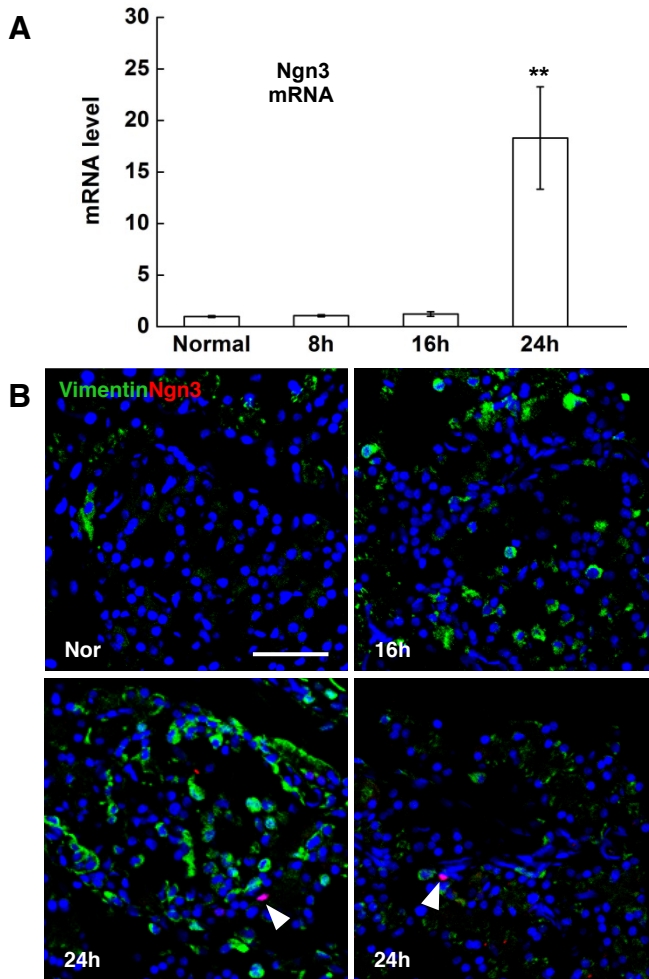

**Figure S5. Massive beta-cell loss induced limited Ngn3 activation.** (A) Expression of Ngn3 gene in pancreas of normal control and STZ-treated rats at indicated time points (8 h, 16 h, and 24 h). (B) Photomicrographs double stained with anti-vimentin (green) and anti-Ngn3 (red) antibodies of normal control and STZ-treated rats (16 h, 24 h). Nuclei were labeled with DAPI. Scale bars, 50 $\mu$ m. The isosceles triangle: Ngn3<sup>+</sup> cells. Data are shown as means  $\pm$  SEM, n=3 per group; \*P < 0.05 and \*\*P < 0.01.
